# Supplementary material
Source: publisher figshare collection journal article supplement (https://sage.figshare.com/ndownloader/files/15103496)
Supplement: Supplementary file 1 [file 15103496]

# Online appendix for:

## 'Crisis bargaining in the European Union: Formal rules or market pressure?'

**Daniel Finke, Department of Political Science, University of Aarhus, Aarhus, Denmark**

**Stefanie Bailer, Department for Social Sciences, University of Basel, Basel, Switzerland**

This Online appendix is structured in three sections. A1 reveals the allocation of individual reform issues to our three theoretical reform dimensions. A2 discusses different ways to evaluate model predictions, before listing the point predictions for all individual issues. A3 gives model predictions for single-issue models, i.e. models which do not allow for issue-linkage.

### **A1. Allocation of negotiation issues**

| <b>Issue abbreviation</b> | <b>Definition of issue</b>                      | <b>Allocation</b>    |
|---------------------------|-------------------------------------------------|----------------------|
| EFSF1                     | Preparedness to issue loan guarantees           | Transfer             |
| EFSF2                     | IMF involvement                                 | Austerity            |
| EFSF3                     | Enhancement of the EFSF's effective capacity    | Transfer             |
| EFSF4                     | Allowing the EFSF to use additional instruments | Transfer             |
| ESM1                      | Changing EU treaties                            | Institutionalization |
| ESM2                      | Size of ESM                                     | Transfer             |
| ESM3                      | Conditionality                                  | Austerity            |
| ESM4                      | Private sector involvement                      | Transfer             |
| ESM5                      | Support instruments of ESM/EFSF                 | Transfer             |
| ESM6                      | Financing of the ESM                            | Transfer             |
| ESM7                      | Role of supra-national institutions in the ESM  | Institutionalization |
| FC1                       | Adoption of the fiscal compact                  | Institutionalization |
| FC2                       | Fiscal compact adopted by treaty change         | Institutionalization |
| FC3                       | The legal form of the debt brake                | Institutionalization |
| FC4                       | The role of the ECJ in the fiscal compact       | Institutionalization |

|     |                                                   |                      |
|-----|---------------------------------------------------|----------------------|
| FC5 | The role of the EC in the fiscal compact          | Institutionalization |
|     | The participation of non-Euro members in the      |                      |
| FC6 | Euro summit                                       | Institutionalization |
| FC7 | The purpose of the fiscal compact                 | Austerity            |
| FC8 | Tax policy coordination                           | Austerity            |
| FC9 | Incorporation to EU treaties                      | Institutionalization |
| G1  | Initial willingness to support Greece (Bailout I) | Transfer             |
|     | The First Greek Programme: ad hoc vs.             |                      |
| G2  | systematic                                        | Institutionalization |
|     | The IMF involvement in the First Greek            |                      |
| G3  | Programme                                         | Austerity            |
| G4  | Debt relief in the Second Greek Package           | Transfer             |
|     | Suspension of council voting rights for SGP       |                      |
| SP1 | Non-compliant member government                   | Institutionalization |
| SP2 | Withholding EU funds to deficit countries         | Transfers            |
|     | The blocking of SGP sanctions by reversed         |                      |
| SP3 | qualified majority                                | Institutionalization |
| SP5 | Six-pack rules on 'good' and 'bad' debts          | Austerity            |
|     | Six-pack – asymmetry of macro-economic            |                      |
| SP6 | imbalances                                        | Austerity            |
| TP1 | Redemption fund in two-pack                       | Transfers            |
| TP2 | Pre-approving budgets by the Commission           | Institutionalization |
| TP3 | Independent macro-economic forecasts              | Institutionalization |

## **A2. Model predictions at disaggregated level**

The visual inspection of the model predictions, winsets and Nash product along the three phases of bargaining over EMU reforms leads us to the following conclusions. First, procedural agenda setting rules matter, and consequently, the Commission had agenda setting power in legislative, but not in intergovernmental bargaining. Second, formal voting rules improve the predictions. Explicitly modelling the unanimity winset for intergovernmental bargaining and the QMV winset for legislative bargaining leads to systematically better predictions. Third, economic bargaining power is shown to have been particularly relevant in times of crisis, especially concerning the first negotiation package (first bailout of Greece and EFSF) and partly package 1 (ESM and Fiscal Compact).

Above, we justify two important steps in our research design, namely (1) aggregating governmental positions to three theoretically meaningful dimensions and (2) analyzing cases as reform packages instead of individual treaties or laws. Here we check the robustness of our results by analyzing the disaggregated model predictions for each of the six cases plus the negotiations over the Banking Union in Table A2 in the Online appendix.

The results in Table A2 partly confirm our above conclusions but are less unambiguous. In particular, Table A2 does not reflect the relevance of the winset of the status quo, i.e. the unconstrained models frequently outperform their constrained competitors. The reason for these inconclusive results is that for some of the individual dimensions we are only able to locate the status quo by making very crude assumptions. As discussed above, this holds for all issues that refer to the design of institutions that are yet to be founded, meaning that an actual status quo does not exist. Hence, the results in Table A2 justify our aggregation decision and, more generally,

illustrate the importance of correctly conceptualizing the reform space and identifying the location of the status quo therein. Despite these operational shortcomings, the disaggregated findings indicate the relevance of economic power (as visible in the better model predictions for the asymmetrical NBS, which integrates economic power) during the height of the crisis and, partly, the power of the Commission in legislative bargaining.

|                                                   | OUT    | NBS   | NBA   | NBCS  | NBCA  | ASC   | AS    |
|---------------------------------------------------|--------|-------|-------|-------|-------|-------|-------|
| Initial willingness to support Greece (Bailout I) | 100.00 | 79.19 | 74.40 | 41.36 | 40.10 | 25.50 | 100.0 |
| The First Greek Program: ad hoc vs. systematic    | 0.00   | 64.07 | 65.40 | 40.13 | 42.60 | 66.98 | 100.0 |
| The IMF involvement in the First Greek Program    | 100.00 | 51.43 | 56.30 | 49.01 | 51.70 | 50.00 | 50.00 |
| Debt relief in the Second Greek Package           | 50.00  | 44.04 | 45.70 | 45.21 | 46.30 | 50.00 | 50.00 |
|                                                   |        | 83.26 | 82.83 | 87.59 | 88.03 | 111.9 | 111.8 |
|                                                   | OUT    | NBS   | NBA   | NBCS  | NBCA  | ASC   | AS    |
| Preparedness to issue loan guarantees             | 100.00 | 66.20 | 92.40 | 61.80 | 62.20 | 50.10 | 100.0 |
| IMF involvement                                   | 100.00 | 77.60 | 42.30 | 61.90 | 60.80 | 49.90 | 0.00  |
| Enhancement of the EFSF's effective capacity      | 100.00 | 41.40 | 60.20 | 34.20 | 35.70 | 53.70 | 100.0 |
| Allowing the EFSF to use additional instruments   | 100.00 | 62.60 | 67.70 | 46.90 | 48.40 | 53.50 | 100.0 |
|                                                   |        | 80.48 | 77.55 | 100.3 | 98.81 | 96.47 | 100.0 |
|                                                   | OUT    | NBS   | NBA   | NBCS  | NBCA  | ASC   | AS    |
| Changing EU treaties                              | 20.00  | 17.90 | 24.20 | 21.50 | 27.40 | 24.40 | 20.00 |
| Size of ESM                                       | 0.00   | 85.20 | 67.20 | 74.10 | 54.10 | 77.80 | 100.0 |
| Conditionality                                    | 100.00 | 100.0 | 100.0 | 100.0 | 100.0 | 100.0 | 100.0 |
| Private sector involvement                        | 20.00  | 33.20 | 35.70 | 31.80 | 33.50 | 30.00 | 30.00 |
| Support instruments of ESM                        | 20.00  | 54.30 | 39.50 | 37.10 | 21.90 | 77.80 | 100.0 |
| Financing of the ESM                              | 20.00  | 71.20 | 54.60 | 56.20 | 39.90 | 20.00 | 20.00 |
| Role of supranational institutions in the ESM     | 40.00  | 34.60 | 39.40 | 36.00 | 39.00 | 95.70 | 100.0 |
|                                                   |        | 106.1 | 79.74 | 85.15 | 59.70 | 112.3 | 141.7 |
|                                                   | OUT    | NBS   | NBA   | NBCS  | NBCA  | ASC   | AS    |
| Adoption of the fiscal compact                    | 50.00  | 100.0 | 100.0 | 100.0 | 100.0 | 100.0 | 100.0 |
| Fiscal compact adopted by treaty change           | 0.00   | 75.60 | 77.10 | 74.70 | 75.00 | 50.00 | 50.00 |
| The legal form of the debt brake                  | 50.00  | 37.90 | 38.90 | 30.50 | 33.20 | 50.00 | 50.00 |
| The role of the ECJ in the fiscal compact         | 0.00   | 4.90  | 8.20  | 3.60  | 6.40  | 0.00  | 100.0 |
| The role of the EC in the fiscal compact          | 0.00   | 48.30 | 57.50 | 46.10 | 55.00 | 0.00  | 100.0 |
| The participation of non-euro members in the Euro | 50.00  | 49.60 | 51.40 | 48.90 | 49.80 | 50.00 | 50.00 |
| The purpose of the fiscal compact                 | 0.00   | 57.20 | 49.80 | 57.60 | 51.80 | 50.00 | 50.00 |
| Tax policy coordination                           | 0.00   | 71.00 | 65.40 | 69.10 | 62.10 | 71.40 | 71.40 |
| Incorporation to EU Treaties                      | 100.00 | 100.0 | 100.0 | 100.0 | 100.0 | 100.0 | 100.0 |
|                                                   |        | 137.9 | 136.7 | 136.7 | 134.2 | 112.2 | 180.5 |
|                                                   | OUT    | NBS   | NBA   | NBCS  | NBCA  | ASC   | AS    |
| Suspension of Council voting rights for SGP non-  | 0.00   | 35.60 | 45.90 | 13.50 | 50.10 | 70.70 | 70.80 |
| Withholding EU Funds to deficit countries         | 0.00   | 40.50 | 78.80 | 18.00 | 21.90 | 0.90  | 0.00  |
| The blocking of SGP sanctions by reversed QMV     | 100.00 | 73.40 | 90.20 | 31.30 | 47.20 | 50.50 | 100.0 |
| Six-pack rules on 'good' and 'bad' debts          | 100.00 | 60.70 | 90.00 | 47.10 | 69.70 | 78.30 | 100.0 |
|                                                   |        | 71.83 | 92.26 | 89.58 | 81.83 | 89.00 | 70.80 |
|                                                   | OUT    | NBS   | NBA   | NBCS  | NBCA  | ASC   | AS    |
| Redemption fund in two-pack                       | 0.00   | 46.60 | 33.90 | 45.00 | 30.10 | 31.90 | 33.00 |
| Pre-approval of budgets by the Commission         | 50.00  | 2.40  | 33.20 | 0.00  | 39.90 | 34.20 | 100.0 |
| Independent macro-economic forecasts              | 0.00   | 3.70  | 0.00  | 0.00  | 3.10  | 15.00 | 100.0 |
|                                                   |        | 66.72 | 37.83 | 67.27 | 31.90 | 38.63 | 116.5 |

|                                                           | OUT   | NBS   | NBA   | NBCS  | NBCA  | ASC   | AS    |
|-----------------------------------------------------------|-------|-------|-------|-------|-------|-------|-------|
| EU cap on bank bonuses: legal vs. shareholder-approved    | 100.0 | 91.30 | 94.60 | 96.30 | 97.50 | 88.00 | 100.0 |
| Capital buffers: centralization vs. flexibility           | 50.00 | 16.30 | 36.50 | 24.40 | 44.90 | 65.90 | 100.0 |
| Scope of the SSM: all banks vs. some banks                | 70.00 | 75.40 | 42.40 | 51.40 | 31.00 | 80.20 | 100.0 |
| Double majority for EBA's decisions                       | 0.00  | 8.20  | 2.10  | 4.20  | 0.70  | 40.10 | 50.00 |
| Institutional responsibility for SSM at ECB               | 100.0 | 39.30 | 16.60 | 28.10 | 15.00 | 75.10 | 100.0 |
| SSM deadlines: speed vs. quality                          | 50.00 | 53.00 | 21.40 | 27.00 | 14.50 | 16.70 | 20.00 |
| SRM: decision making powers                               | 70.00 | 45.80 | 8.30  | 19.30 | 3.50  | 61.00 | 100.0 |
| SRF build-up and mutualization                            | 80.00 | 62.70 | 15.66 | 35.10 | 8.40  | 53.50 | 80.00 |
| SRF fiscal backstop                                       | 0.00  | 56.00 | 21.90 | 31.10 | 15.20 | 64.00 | 100.0 |
|                                                           |       | 94.99 | 131.0 | 110.8 | 140.7 | 93.36 | 133.0 |
|                                                           | OUT   | NBS   | NBA   | NBCS  | NBCA  | ASC   | AS    |
| Suspension of Council voting rights for SGP non-compliant | 0.00  | 35.60 | 40.20 | 18.60 | 31.30 | 32.30 | 100.0 |
| Withholding EU Funds to deficit countries                 | 0.00  | 40.40 | 61.30 | 22.00 | 39.00 | 34.20 | 50.00 |
| The blocking of SGP sanctions by reversed QMV             | 100.0 | 73.40 | 82.20 | 41.20 | 63.20 | 53.90 | 100.0 |
| Six-pack rules on 'good' and 'bad' debts                  | 100.0 | 60.70 | 79.30 | 49.00 | 63.70 | 53.00 | 20.00 |
| Redemption fund in two-pack                               | 0.00  | 46.40 | 42.10 | 44.00 | 48.30 | 63.30 | 100.0 |
| Pre-approving Budgets by the Commission                   | 50.00 | 2.40  | 7.50  | 2.00  | 5.00  | 51.00 | 80.00 |
| Independent macro-economic forecasts                      | 0.00  | 3.70  | 6.10  | 2.50  | 4.00  | 64.70 | 100.0 |
|                                                           |       | 97.90 | 98.67 | 105.5 | 97.71 | 121.4 | 93.40 |

**A3. Comparing single-dimensional and three-dimensional model Predictions (Note: Upper table contains single-dimensional predictions; lower table contains three-dimensional predictions. Mean Errors are standardized to enable comparison.)**

|                          | OUT  | NBS   | NBA   | NBCS  | NBCA  | ASC   | AS     |
|--------------------------|------|-------|-------|-------|-------|-------|--------|
| <b>Phase 1</b>           |      |       |       |       |       |       |        |
| Transfer                 | 90   | 73.34 | 20.00 | 12.21 | 18.75 | 62.28 | 90     |
| Fiscal Discipline        | 100  | 48.50 | 0     | 0     | 0     | 68.65 | 25     |
| Institutionalization     | 0    | 55.50 | 0     | 0     | 0     | 58.88 | 100    |
| <i>Stand. Mean Error</i> | 0    | 41.23 | 56.66 | 59.26 | 57.08 | 39.31 | 58.33  |
| <b>Phase 2</b>           |      |       |       |       |       |       |        |
| Transfer                 | 18.8 | 73.70 | 31.75 | 15.63 | 29.30 | 61.96 | 78.20  |
| Fiscal Discipline        | 50   | 48.98 | 17.25 | 17.25 | 14.02 | 65.12 | 48.20  |
| Institutionalization     | 32.5 | 52.68 | 52.50 | 62.50 | 48.20 | 58.78 | 52.50  |
| <i>Stand. Mean Error</i> | 0    | 40    | 64.50 | 73.20 | 64.96 | 40.56 | 38.70  |
| <b>Phase 3</b>           |      |       |       |       |       |       |        |
| Transfer                 | 50   | 52.60 | 50    | 50    | 50    | 68.70 | 50.00  |
| Fiscal Discipline        | 50   | 53.31 | 50    | 76.55 | 50    | 46.50 | 66.70  |
| Institutionalization     | 57.1 | 31.41 | 35.08 | 27.15 | 27.15 | 35.23 | 100.00 |
| <i>Stand. Mean Error</i> | 0    | 38.5  | 41.69 | 30.2  | 39.05 | 36.67 | 57.76  |

|                          | OUT  | NBS   | NBA   | NBCS  | NBCA  | ASC   | AS     |
|--------------------------|------|-------|-------|-------|-------|-------|--------|
| <b>Phase 1</b>           |      |       |       |       |       |       |        |
| Transfer                 | 90   | 73.30 | 62.30 | 55.20 | 47.20 | 46.60 | 90.00  |
| Fiscal Discipline        | 100  | 48.50 | 68.60 | 44.80 | 62.80 | 38.70 | 25.00  |
| Institutionalization     | 0    | 55.50 | 58.90 | 15.00 | 20.20 | 21.80 | 100.00 |
| <i>Stand. Mean Error</i> | 0    | 43.7  | 41.72 | 38.65 | 34.75 | 45.15 | 72.16  |
| <b>Phase 2</b>           |      |       |       |       |       |       |        |
| Transfer                 | 18.8 | 73.70 | 61.20 | 64.10 | 39.50 | 78.10 | 78.20  |
| Fiscal Discipline        | 50   | 48.90 | 65.10 | 40.90 | 76.10 | 48.20 | 48.20  |
| Institutionalization     | 32.5 | 52.90 | 58.80 | 52.60 | 66.10 | 52.5  | 52.50  |
| <i>Stand. Mean Error</i> | 0    | 33.82 | 30.09 | 29.09 | 26.73 | 36.14 | 36.19  |
| <b>Phase 3</b>           |      |       |       |       |       |       |        |
| Transfer                 | 50   | 52.10 | 68.70 | 50.10 | 52.50 | 43.2  | 50.00  |
| Fiscal Discipline        | 50   | 56.30 | 46.50 | 57.70 | 55.00 | 60.2  | 66.70  |
| Institutionalization     | 57.1 | 31.40 | 36.20 | 28.40 | 28.90 | 57.6  | 100.00 |
| <i>Stand. Mean Error</i> | 0    | 15.32 | 16.31 | 17.15 | 16.59 | 7.08  | 26.58  |
